# Supplementary material
Source: PubMed Central journal article supplement (PMC7753721)

ROC Curve

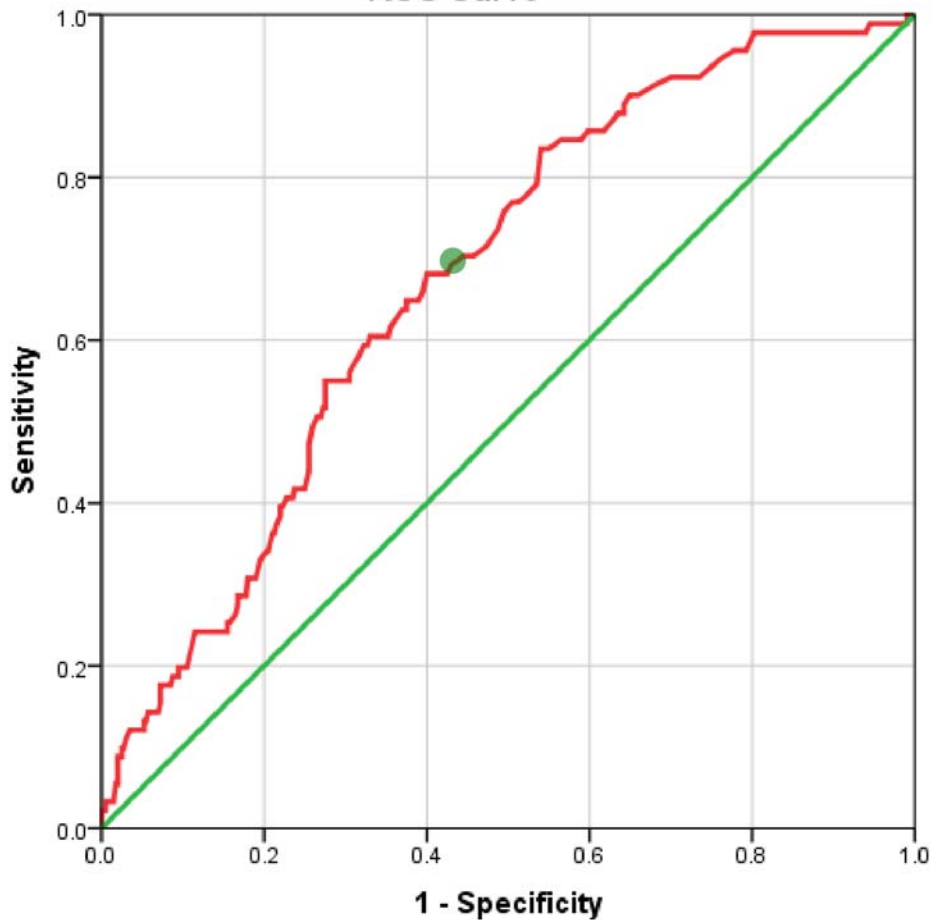

Supplement: JDB-13-253-s002.pdf [file JDB-13-253-s002.pdf]
